# Supplementary material
Source: publisher figshare collection journal article supplement (https://brill.figshare.com/articles/dataset/_/25755690)
Supplement: Supplementary file 1 [file 1]

## Sheet: Table S1
Table S1. Sampling details.
Locality	Latitude	Longitude	Sample ID	Haplotype	Geographic group	Type of sample
Samples newly sequenced in this study
Spain: La Manjoya	43.3335	-5.86831	BW_1558	Lhel010	Asturian	Tissue
Spain: San Vicente	43.4083	-6.29145	BW_1831	Lhel010	Asturian	Tissue
Spain: San Vicente	43.4083	-6.29145	BW_1832	Lhel010	Asturian	Tissue
Spain: Ourense	42.336	-7.864	BW_1559	Lhel004	East Cantabrian	Tissue
Spain: Poza de la Sal	42.6686	-3.5288	swab_1569/T31-13-18	Lhel015	East Cantabrian	Skin swab
Belgium: Bekkevoort	50.9507	4.9694	swab_1194	Lhel016	Northeastern	Skin swab
Belgium: Linkebeek	50.7667	4.33282	swab_1213	Lhel016	Northeastern	Skin swab
Belgium: Meerle	51.488	4.80946	swab_1216	Lhel006	Northeastern	Skin swab
Belgium: Meerle	51.488	4.80946	swab_1217	Lhel006	Northeastern	Skin swab
Belgium: Melle	50.9978	3.79412	swab_1208	Lhel016	Northeastern	Skin swab
Belgium: Peer	51.106	5.3976	swab_1195	Lhel016	Northeastern	Skin swab
Belgium: Sint-Andries	51.1712	3.16011	swab_1200	Lhel016	Northeastern	Skin swab
Belgium: Sint-Andries	51.1712	3.16011	swab_1201	Lhel016	Northeastern	Skin swab
Belgium: Sint-Andries	51.1712	3.16011	swab_1203	Lhel016	Northeastern	Skin swab
England: Canterbury	51.296	1.054	swab_1443	Lhel016	Northeastern	Skin swab
England: Turnbridge wells common	51.129	0.251	swab_1447	Lhel016	Northeastern	Skin swab
England: Turnbridge wells common	51.129	0.251	swab_1449	Lhel016	Northeastern	Skin swab
France: Arfons	43.4252	2.18059	BW_2195	Lhel016	Northeastern	Tissue
France: Arfons	43.4252	2.18059	BW_2196	Lhel016	Northeastern	Tissue
France: Billiat	46.071	5.78238	BW_2197	Lhel016	Northeastern	Tissue
France: Brielles	48.0132	-1.07289	swab_0923/BEV.15001	Lhel016	Northeastern	Tissue
France: Brielles	48.0132	-1.07289	swab_0925/BEV.15003	Lhel016	Northeastern	Tissue
France: Champigné	47.6409	-0.5894	swab_1356	Lhel016	Northeastern	Tissue
France: Champigné	47.6409	-0.5894	swab_1357	Lhel016	Northeastern	Tissue
France: Champigné	47.6409	-0.5894	swab_1358	Lhel016	Northeastern	Tissue
France: Compiègne	49.3297	2.8396	swab_1359	Lhel027	Northeastern	Tissue
France: Compiègne	49.3297	2.8396	swab_1360	Lhel028	Northeastern	Tissue
France: Compiègne	49.3297	2.8396	swab_1361	Lhel027	Northeastern	Tissue
France: Esplas-de-Sérou	42.9749	1.37499	BW_2199	Lhel016	Northeastern	Tissue
France: Etang "Repsol"	44.9266	-0.490358	swab_0915/BEV.12458	Lhel016	Northeastern	Tissue
France: Etang "Repsol"	44.9266	-0.490358	swab_0916/BEV.12459	Lhel016	Northeastern	Tissue
France: Etang "Repsol"	44.9266	-0.490358	swab_0917/BEV.12463	Lhel016	Northeastern	Tissue
France: Haute-Saône	47.7759	6.77794	swab_0901/BEV.7044	Lhel016	Northeastern	Tissue
France: Jublain2	48.2341	-0.52654	BW_1557	Lhel016	Northeastern	Tissue
France: Larzac	43.828	3.445	swab_1421	Lhel016	Northeastern	Tissue
France: Le Soulie	43.5666	2.73856	BW_1833	Lhel016	Northeastern	Tissue
France: Le Soulie	43.5666	2.73856	BW_1834	Lhel016	Northeastern	Tissue
France: Le Soulie	43.5666	2.73856	BW_1835	Lhel016	Northeastern	Tissue
France: Mare de St-Etienne de Gabriac amont	43.8168	3.7867	swab_0912/BEV.11007	Lhel016	Northeastern	Tissue
France: Mare de St-Etienne de Gabriac amont	43.8168	3.7867	swab_0913/BEV.11008	Lhel016	Northeastern	Tissue
France: Mare de St-Etienne de Gabriac amont	43.8168	3.7867	swab_0914/BEV.11009	Lhel016	Northeastern	Tissue
France: Massegros	44.3506	3.18657	BW_2198	Lhel016	Northeastern	Tissue
France: Oust	42.8907	1.18396	BW_1836	Lhel016	Northeastern	Tissue
France: Chalets d'Iraty	43.0458	-1.07309	swab_0930/BEV.15453	Lhel006	Northeastern	Tissue
France: Recort	42.9574	1.5387	BW_2200	Lhel016	Northeastern	Tissue
France: Saint-Guilhem-le-Désert	43.7738	3.53848	swab_0977	Lhel016	Northeastern	Tissue
France: Saint-Guilhem-le-Désert	43.7738	3.53848	swab_0978	Lhel016	Northeastern	Tissue
France: Sainte-Eulalie	44.817	4.178	swab_0918/BEV.13857	Lhel016	Northeastern	Tissue
France: Site de Beaulieu-sur-Oudon	48.0126	-1.0123	swab_0927/BEV.15300	Lhel016	Northeastern	Tissue
France: Site de Beaulieu-sur-Oudon	48.0126	-1.0123	swab_0928/BEV.15301	Lhel016	Northeastern	Tissue
France: Site de Beaulieu-sur-Oudon	48.0126	-1.0123	swab_0929/BEV.15302	Lhel016	Northeastern	Tissue
Germany: Pfalzerwald, Durrentalbach	49.2575	7.93693	swab_0686	Lhel016	Northeastern	Skin swab
Germany: Pfalzerwald, Hollerbach	49.2959	8.0017	swab_0692	Lhel016	Northeastern	Skin swab
Germany: Pfalzerwald, Hollerbach	49.2959	8.0017	swab_0693	Lhel016	Northeastern	Skin swab
Germany: Pfalzerwald, Hollerbach	49.2959	8.0017	swab_0694	Lhel016	Northeastern	Skin swab
Germany: Pfalzerwald, Landauer Strasse	49.3343	8.14993	swab_0703	Lhel016	Northeastern	Skin swab
Netherlands: Amsterdam	52.3495	4.93563	swab_1271	Lhel016	Northeastern	Skin swab
Netherlands: Buren	51.9082	5.31288	swab_0964	Lhel016	Northeastern	Skin swab
Netherlands: Buren	51.9082	5.31288	swab_0972	Lhel016	Northeastern	Skin swab
Netherlands: Beekhuizen	52.0174	5.99133	swab_1163	Lhel016	Northeastern	Skin swab
Netherlands: Beekhuizen	52.0174	5.99133	swab_1170	Lhel016	Northeastern	Skin swab
Netherlands: Beekhuizen	52.0174	5.99133	swab_1176	Lhel016	Northeastern	Skin swab
Netherlands: Den Haag	52.0833	4.23932	swab_0339	Lhel016	Northeastern	Skin swab
Netherlands: Vledder	52.8631	6.18798	swab_1290	Lhel016	Northeastern	Skin swab
Netherlands: Vledder	52.8631	6.18798	swab_1292	Lhel016	Northeastern	Skin swab
Netherlands: Vledder	52.8631	6.18798	swab_1293	Lhel016	Northeastern	Skin swab
Netherlands: Vledder	52.8631	6.18798	swab_1294	Lhel016	Northeastern	Skin swab
Netherlands: Ecoduct Brunssummerheide	50.9291	6.00772	swab_0546	Lhel016	Northeastern	Skin swab
Netherlands: Korteven	51.4473	4.31755	swab_0616	Lhel016	Northeastern	Skin swab
Netherlands: Krogten	51.4446	4.65983	swab_1096	Lhel016	Northeastern	Skin swab
Netherlands: Landschotse Heide	51.4513	5.2465	swab_0780	Lhel016	Northeastern	Skin swab
Netherlands: Langoed Rheebruggen	52.7893	6.2994	swab_1070	Lhel016	Northeastern	Skin swab
Netherlands: Langoed Rheebruggen	52.7898	6.2958	swab_1075	Lhel016	Northeastern	Skin swab
Netherlands: Langoed Rheebruggen	52.7898	6.2958	swab_1076	Lhel016	Northeastern	Skin swab
Netherlands: Langoed Rheebruggen	52.7893	6.2994	swab_1137	Lhel016	Northeastern	Skin swab
Netherlands: Langoed Rheebruggen	52.7893	6.2994	swab_1138	Lhel016	Northeastern	Skin swab
Netherlands: Langoed Rheebruggen	52.7893	6.2994	swab_1139	Lhel016	Northeastern	Skin swab
Netherlands: Langoed Rheebruggen	52.7898	6.2958	swab_1140	Lhel016	Northeastern	Skin swab
Netherlands: Langoed Rheebruggen	52.7898	6.2958	swab_1141	Lhel016	Northeastern	Skin swab
Netherlands: Langoed Rheebruggen	52.7898	6.2958	swab_1142	Lhel016	Northeastern	Skin swab
Netherlands: Liesbos	51.5866	4.70469	swab_0462	Lhel016	Northeastern	Skin swab
Netherlands: Liesbos	51.5866	4.70469	swab_0463	Lhel016	Northeastern	Skin swab
Netherlands: Liesbos	51.5866	4.70469	swab_0528	Lhel016	Northeastern	Skin swab
Netherlands: Nationaal Park de Meinweg, De drie vennen	51.1577	6.08798	swab_0648	Lhel016	Northeastern	Skin swab
Netherlands: Nationaal Park de Meinweg, De drie vennen	51.1577	6.08798	swab_0649	Lhel016	Northeastern	Skin swab
Netherlands: Nationaal Park de Meinweg, De drie vennen	51.1577	6.08798	swab_0650	Lhel016	Northeastern	Skin swab
Netherlands: Nationaal Park de Meinweg, De drie vennen	51.1577	6.08798	swab_0653	Lhel016	Northeastern	Skin swab
Netherlands: Schinveld	50.9719	6.01369	swab_0536	Lhel016	Northeastern	Skin swab
Netherlands: Schinveld	50.9719	6.01369	swab_0537	Lhel016	Northeastern	Skin swab
Netherlands: Schinveld	50.9719	5.09719	swab_0538	Lhel016	Northeastern	Skin swab
Netherlands: Schinveld	50.9719	6.01369	swab_0538	Lhel016	Northeastern	Skin swab
Netherlands: Waayenberg Zundert	51.4614	4.69728	swab_0596	Lhel016	Northeastern	Skin swab
Spain: Ibon de Piedrafita	42.6968	-0.353584	BW-2201	Lhel017	Northeastern	Tissue
Samples taken from Recuero
Spain: Cabrillanes	42.9531	-6.15167	JF812693	Lhel010	Asturian	n/a
Spain: El Fito	43.4378	-5.19	JF812668	Lhel007	Asturian	n/a
Spain: El Fito	43.4378	-5.19	JF812672	Lhel007	Asturian	n/a
Spain: El Fito	43.4378	-5.19	JF812673	Lhel007	Asturian	n/a
Spain: El Fito	43.4378	-5.19	JF812669	Lhel008	Asturian	n/a
Spain: El Fito	43.4378	-5.19	JF812670	Lhel009	Asturian	n/a
Spain: El Fito	43.4378	-5.19	JF812671	Lhel010	Asturian	n/a
Spain: Esqueiro	43.5394	-6.26556	JF812689	Lhel010	Asturian	n/a
Spain: Esqueiro	43.5394	-6.26556	JF812690	Lhel014	Asturian	n/a
Spain: Esqueiro	43.5394	-6.26556	JF812691	Lhel014	Asturian	n/a
Spain: Esqueiro	43.5394	-6.26556	JF812692	Lhel014	Asturian	n/a
Spain: Esqueiro	43.5394	-6.26556	JF812734	Lhel014	Asturian	n/a
Spain: Puerto de San Isidro	43.05	-5.317	JF812735	Lhel010	Asturian	n/a
Spain: Tolivia	43.1975	-5.59306	JF812675	Lhel010	Asturian	n/a
Spain: Tolivia	43.1975	-5.59306	JF812680	Lhel010	Asturian	n/a
Spain: Tolivia	43.1975	-5.59306	JF812674	Lhel011	Asturian	n/a
Spain: Tolivia	43.1975	-5.59306	JF812676	Lhel011	Asturian	n/a
Spain: Tolivia	43.1975	-5.59306	JF812677	Lhel011	Asturian	n/a
Spain: Tolivia	43.1975	-5.59306	JF812679	Lhel011	Asturian	n/a
Spain: Tolivia	43.1975	-5.59306	JF812678	Lhel012	Asturian	n/a
Spain: Arija	42.9814	-3.97361	JF812694	Lhel015	East Cantabrian	n/a
Spain: Arija	42.9814	-3.97361	JF812695	Lhel015	East Cantabrian	n/a
Spain: Camprovin	42.35	-2.717	JF812729	Lhel026	East Cantabrian	n/a
Spain: Camprovin	42.35	-2.717	JF812730	Lhel026	East Cantabrian	n/a
Spain: Camprovin	42.35	-2.717	JF812731	Lhel026	East Cantabrian	n/a
Spain: Gama	43.4228	-3.52861	JF812654	Lhel004	East Cantabrian	n/a
Spain: Gama	43.4228	-3.52861	JF812655	Lhel004	East Cantabrian	n/a
Spain: Gama	43.4228	-3.52861	JF812657	Lhel004	East Cantabrian	n/a
Spain: Gama	43.4228	-3.52861	JF812656	Lhel005	East Cantabrian	n/a
Spain: Gama	43.4228	-3.52861	JF812658	Lhel005	East Cantabrian	n/a
Spain: Gama	43.4228	-3.52861	JF812659	Lhel005	East Cantabrian	n/a
Spain: Neila	42.0428	-3.04472	JF812681	Lhel004	East Cantabrian	n/a
Spain: Neila	42.0428	-3.04472	JF812682	Lhel004	East Cantabrian	n/a
Spain: Neila	42.0428	-3.04472	JF812683	Lhel004	East Cantabrian	n/a
Spain: Puerto de Palombera	43.0622	-4.23278	JF812708	Lhel019	East Cantabrian	n/a
Spain: Puerto de Palombera	43.0622	-4.23278	JF812709	Lhel019	East Cantabrian	n/a
Spain: Quintanas de Hormiguera	42.8642	-4.14472	JF812666	Lhel004	East Cantabrian	n/a
Spain: Quintanas de Hormiguera	42.8642	-4.14472	JF812667	Lhel004	East Cantabrian	n/a
Spain: Requejo	43.0092	-4.10167	JF812707	Lhel018	East Cantabrian	n/a
Spain: Santa Ines	42.0167	-2.86667	JF812733	Lhel004	East Cantabrian	n/a
Spain: Tudanca	43.15	-4.36667	JF812736	Lhel004	East Cantabrian	n/a
Spain: Tudanca	43.15	-4.36667	JF812737	Lhel015	East Cantabrian	n/a
Spain: Tudanca	43.15	-4.36667	JF812738	Lhel015	East Cantabrian	n/a
England: Southampton	50.9272	-1.41083	JF812732	Lhel016	Northeastern	n/a
France: Ambleteuse	50.8167	1.6	JF812696	Lhel016	Northeastern	n/a
France: Boullouses	42.5167	2.03333	JF812722	Lhel016	Northeastern	n/a
France: Gan	43.2333	-0.383333	JF812710	Lhel020	Northeastern	n/a
France: Gan	43.2333	-0.383333	JF812711	Lhel020	Northeastern	n/a
Germany: Gehren	50.65	11	JF812746	Lhel016	Northeastern	n/a
Germany: Gehren	50.65	11	JF812747	Lhel016	Northeastern	n/a
Spain: Alfranca	41.5667	-0.733333	JF812739	Lhel006	Northeastern	n/a
Spain: Alfranca	41.5667	-0.733333	JF812740	Lhel006	Northeastern	n/a
Spain: Arties	42.7	0.866667	JF812717	Lhel006	Northeastern	n/a
Spain: Arties	42.7	0.866667	JF812716	Lhel016	Northeastern	n/a
Spain: Beorburu	42.9167	-1.73333	JF812718	Lhel006	Northeastern	n/a
Spain: Beorburu	42.9167	-1.73333	JF812719	Lhel022	Northeastern	n/a
Spain: Beorburu	42.9167	-1.73333	JF812720	Lhel023	Northeastern	n/a
Spain: Beorburu	42.9167	-1.73333	JF812721	Lhel024	Northeastern	n/a
Spain: Camprovin	42.35	-2.71667	JF812728	Lhel006	Northeastern	n/a
Spain: Fagollaga	43.2436	-1.94917	JF812745	Lhel006	Northeastern	n/a
Spain: Ganuza	42.7014	-2.13778	JF812699	Lhel006	Northeastern	n/a
Spain: Ganuza	42.7014	-2.13778	JF812700	Lhel006	Northeastern	n/a
Spain: Larues	42.53	-0.854722	JF812697	Lhel006	Northeastern	n/a
Spain: Larues	42.53	-0.854722	JF812698	Lhel006	Northeastern	n/a
Spain: Moncayo	41.8167	-1.75	JF812741	Lhel006	Northeastern	n/a
Spain: Moncayo	41.8167	-1.75	JF812742	Lhel006	Northeastern	n/a
Spain: Obarenes	42.66	-3.10972	JF812660	Lhel006	Northeastern	n/a
Spain: Obarenes	42.66	-3.10972	JF812661	Lhel006	Northeastern	n/a
Spain: Obarenes	42.66	-3.10972	JF812663	Lhel006	Northeastern	n/a
Spain: Obarenes	42.66	-3.10972	JF812664	Lhel006	Northeastern	n/a
Spain: Obarenes	42.66	-3.10972	JF812665	Lhel006	Northeastern	n/a
Spain: Obarenes	42.66	-3.10972	JF812666	Lhel006	Northeastern	n/a
Spain: Palamos	41.8611	3.14	JF812713	Lhel016	Northeastern	n/a
Spain: Palamos	41.8611	3.14	JF812714	Lhel016	Northeastern	n/a
Spain: Palamos	41.8611	3.14	JF812715	Lhel016	Northeastern	n/a
Spain: Palamos	41.8611	3.14	JF812712	Lhel021	Northeastern	n/a
Spain: Pozo Negro	42.2358	-3.10694	JF812705	Lhel006	Northeastern	n/a
Spain: Pozo Negro	42.2358	-3.10694	JF812706	Lhel006	Northeastern	n/a
Spain: Puerto del Portale	42.8014	-0.422778	JF812701	Lhel017	Northeastern	n/a
Spain: Puerto del Portale	42.8014	-0.422778	JF812702	Lhel017	Northeastern	n/a
Spain: Puerto del Portale	42.8014	-0.422778	JF812703	Lhel017	Northeastern	n/a
Spain: Puerto del Portale	42.8014	-0.422778	JF812704	Lhel017	Northeastern	n/a
Spain: Sos del Rey Católico	42.5	-1.21667	JF812743	Lhel006	Northeastern	n/a
Spain: Sos del Rey Católico	42.5	-1.21667	JF812744	Lhel006	Northeastern	n/a
Spain: Urdiain	42.8833	-2.13333	JF812723	Lhel006	Northeastern	n/a
Spain: Urdiain	42.8833	-2.13333	JF812724	Lhel006	Northeastern	n/a
Spain: Urdiain	42.8833	-2.13333	JF812725	Lhel006	Northeastern	n/a
Spain: Urdiain	42.8833	-2.13333	JF812727	Lhel006	Northeastern	n/a
Spain: Urdiain	42.8833	-2.13333	JF812726	Lhel025	Northeastern	n/a
Portugal: Vagos	40.55	-8.68333	JF812686	Lhel013	Northwestern	n/a
Portugal: Vagos	40.55	-8.68333	JF812687	Lhel013	Northwestern	n/a
Portugal: Vagos	40.55	-8.68333	JF812688	Lhel013	Northwestern	n/a
Portugal: Vila O Conde	41.2792	-8.61722	JF812684	Lhel001	Northwestern	n/a
Portugal: Vila O Conde	41.2792	-8.61722	JF812685	Lhel001	Northwestern	n/a
Spain: Taboada	43.3556	-8.03667	JF812648	Lhel001	Northwestern	n/a
Spain: Taboada	43.3556	-8.03667	JF812652	Lhel001	Northwestern	n/a
Spain: Taboada	43.3556	-8.03667	JF812649	Lhel002	Northwestern	n/a
Spain: Taboada	43.3556	-8.03667	JF812653	Lhel002	Northwestern	n/a
Spain: Taboada	43.3556	-8.03667	JF812650	Lhel003	Northwestern	n/a
Spain: Taboada	43.3556	-8.03667	JF812651	Lhel003	Northwestern	n/a
The Dutch localities in red are introduced. Note that for haplotypes Lhel001-Lhel026 sequences are available from GenBank via Recuero and García-París (2011). Haplotypes Lhel006 and Lhel016 discussed in the main text are highlighted in yellow. GenBank accessions for the newly identified haplotypes, highlighted in red here, are XXX for Lhel027 and XXX for Lhel028. Localities in red font are introd…

## Sheet: Table S2
Table S2. People who provided samples.
Bernadet Adriaenssens
Jesper Berndsen
Ingrid de Boer
Kat 'O Brien
David Broek
Olivier Chaline
Marc Cheylan
Stéphane Damervalle
Clément Fauconnier
Vincent Fradet
Sjanie de Groot
Jeanette Hall
Ado Havermans
Christiane Jakob
Jöran Janse
Miranda de Kock
Kees de Kort
Willem van Kuyk
Petra van Leeuwen
Ton Lenders
Quentin Lepetitcorps
Yoann Mansier
Anthony Mazière
Claude Miaud
Alex Miro
Hans Moonen
Alfredo Nicieza
Adrien Pineau
Blaise Raymond
Roman Rozinek
Richard Struijk
Guillaume Testud
Marc Théry
Geert Timmermans
Rolf Veenhuizen
Frans Vermeer
Manon de Visser
Elizabeth Wild
Paul Wilkinson
