# Supplementary material
Source: publisher figshare collection journal article supplement (https://brill.figshare.com/articles/dataset/_/25755690)
Supplement: Supplementary file 1 [file 1]

## Short Note

Extreme genetic depletion upon postglacial colonization hampers  
determining the provenance of introduced palmate newt populations

Robin Elfering<sup>1,2,‡</sup>, Sophie Mannix<sup>1,2,‡</sup>, Steve Allain<sup>3,4</sup>, Johanna Ambu<sup>5</sup>, Pierre-  
André Crochet<sup>6</sup>, Loïc van Doorn<sup>7,8</sup>, Christophe Dufresnes<sup>5,9</sup>, Robert Jehle<sup>10</sup>,  
Angela Julian<sup>11</sup>, Fairlie Kirkpatrick Baird<sup>12</sup>, David O'Brien<sup>12</sup>, Jean Secondi<sup>13,14</sup>,  
Jeroen Speybroeck<sup>7,8</sup>, Anagnostis Theodoropoulos<sup>1,2</sup>, Tariq Stark<sup>14</sup>, Ben  
Wielstra<sup>1,2,\*</sup>

1 - Naturalis Biodiversity Center, P.O. Box 9517, 2300 RA Leiden, The Netherlands

2 - Institute of Biology Leiden, Leiden University, P.O. Box 9505, 2300 RA Leiden, The  
Netherlands

3 - Durrell Institute of Conservation and Ecology, University of Kent, Canterbury, CT2 7NR,  
UK

4 - Department of Animal Science, Writtle University College, Writtle, CM1 3RR, UK

5 - Laboratory for Amphibian Systematic and Evolutionary Research (LASER), College of  
Biology & Environment, Nanjing Forestry University, Nanjing, China

6 - CEFE, Université Montpellier, CNRS, EPHE, IRD, Université Paul Valéry Montpellier 3,  
Montpellier, France

7 - Research Institute for Nature and Forest (INBO), Havenlaan 88 Bus 73, B-1000 Brussels,  
Belgium

8 - Institut de Systématique, Evolution, Biodiversité (ISYEB), Muséum National d'Histoire Naturelle, 45 rue Buffon, 75005 Paris, France

9 - Muséum national d'Histoire naturelle, CNRS, Sorbonne Université, EPHE, Université des Antilles, Paris, France

10 - School of Science, Engineering and Environment, University of Salford, M5 4WT Salford, UK

11 - Amphibian and Reptile Groups of UK (ARG UK), 82 Gidley Way, Horspath, Oxford, OX33 1TG, UK

12 - Highland Amphibian and Reptile Project, Dingwall, IV7 8HZ, UK

13 - Université Angers, Angers France

14 - Université Claude Bernard Lyon 1, LEHNA UMR 5023, CNRS, ENTPE, F-69622, Villeurbanne, France

15 - Reptile, Amphibian and Fish Conservation Netherlands (RAVON), P.O. Box 1413, 6501 BK Nijmegen, The Netherlands

‡These authors contributed equally to this work.

\*Corresponding author; e-mail: [ben.wielstra@naturalis.nl](mailto:ben.wielstra@naturalis.nl)

**Supplementary material**
